# Supplementary material for: Non-alcoholic fatty liver disease – discussed under the light of Unani medicine
Source: publisher site journal article supplement (doi:10.1515/jcim-2021-0296), 2021-09-22
Supplement: Supplementary file 1 [file j_jcim-2021-0296_suppl.docx]

**PNPLA3**Patatin-like phospholipase domain-containing protein 3

**TAGs** Triacylglycerol

**DAGs** Diacylglycerol

**FATPs** Fatty acid transport proteins

**FAT**Fatty acid translocase

**NF-κ β**Nuclear factor-kappa β

**IKKβ**Inhibitor of nuclear factor-kappaβ

**IL** Interleukin

**TNF**Tumour Necrosis Factor

**ALT** Alanine Aminotransferase

**AST** Aspartate Aminotransferase

**GGT** Gamma-Glutamyl Transpeptidase

**ANA** Anti-nuclear antibodies

**MRI** Magnetic resonance Imaging

**CT** Computerized Tomography

**ELF** Enhanced Liver Fibrosis

**CK** Cytokeratin

**AUROC**Area under the receiver operating curve
